# Supplementary material for: Ileal Pouch-anal Anastomosis Complications and Pouch Failure: A systematic review and meta-analysis
Source: PubMed Central journal article supplement — Ann Surg Open. 2021 Jun 21;2(2):e074. doi: 10.1097/AS9.0000000000000074 (PMC10455305; doi:10.1097/as9.0000000000000074), 2021-06-21
Supplement: as9-2-e074-s001.pdf [file as9-2-e074-s001.pdf]

Supplementary figures

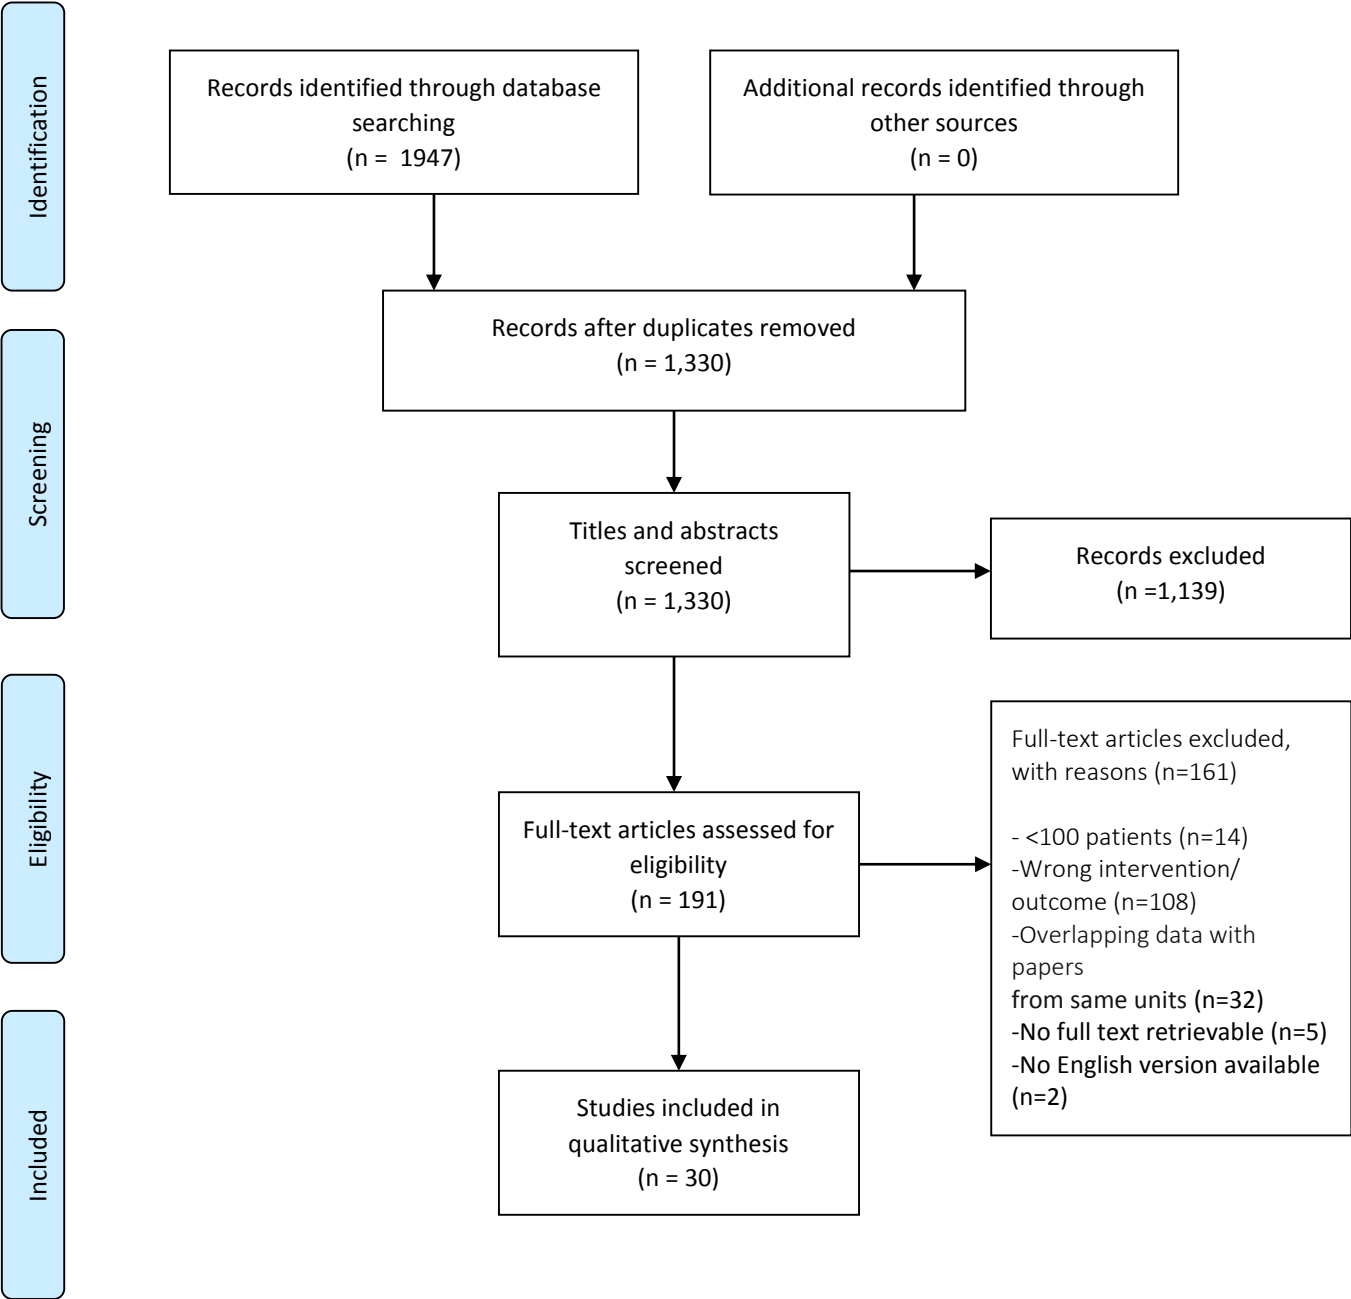

Supplementary Figure 1. PRISMA flowchart of study selection

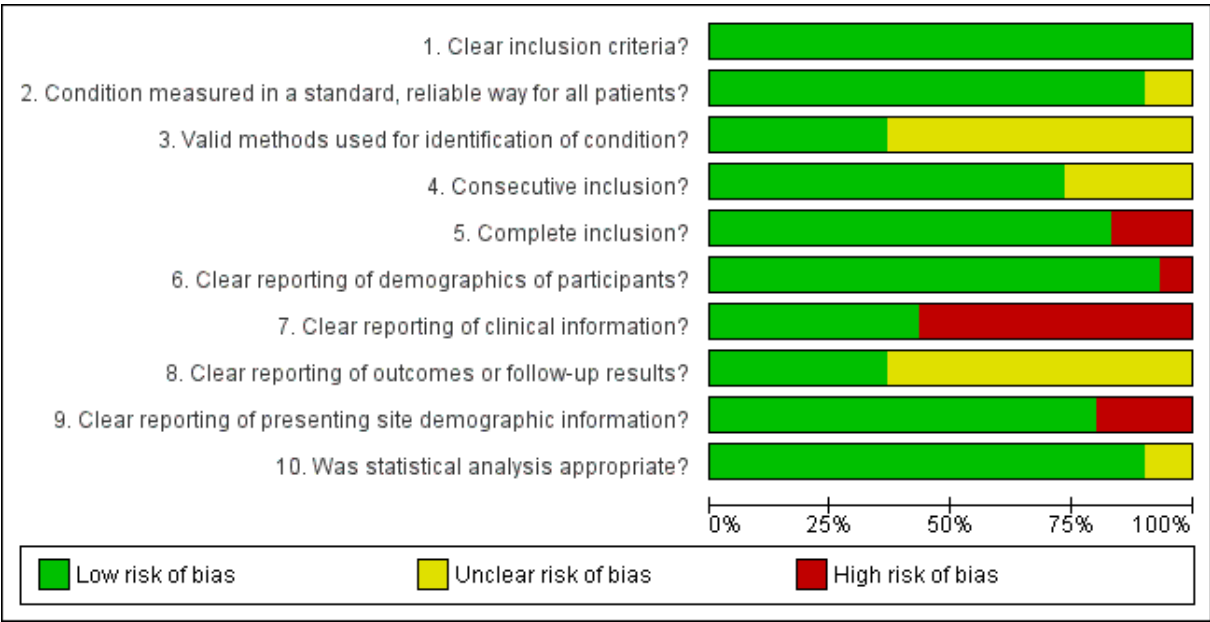

**Supplementary Figure 2.** Risk of Bias graph demonstrating the overall risk of bias for each item of the JBI checklist across all included studies.

|                       | 1. Clear inclusion criteria? | 2. Condition measured in a standard, reliable way for all patients? | 3. Valid methods used for identification of condition? | 4. Consecutive inclusion? | 5. Complete inclusion? | 6. Clear reporting of demographics of participants? | 7. Clear reporting of clinical information? | 8. Clear reporting of outcomes or follow-up results? | 9. Clear reporting of presenting site demographic information? | 10. Was statistical analysis appropriate? |
|-----------------------|------------------------------|---------------------------------------------------------------------|--------------------------------------------------------|---------------------------|------------------------|-----------------------------------------------------|---------------------------------------------|------------------------------------------------------|----------------------------------------------------------------|-------------------------------------------|
| Carcamo 2020          | +                            | +                                                                   | ?                                                      | +                         | +                      | +                                                   | -                                           | ?                                                    | +                                                              | +                                         |
| Cataneo 2019          | +                            | +                                                                   | ?                                                      | +                         | -                      | -                                                   | -                                           | ?                                                    | +                                                              | +                                         |
| Dafnis 2016           | +                            | +                                                                   | ?                                                      | +                         | +                      | +                                                   | +                                           | ?                                                    | +                                                              | +                                         |
| Die 2020              | +                            | +                                                                   | ?                                                      | ?                         | +                      | +                                                   | -                                           | ?                                                    | +                                                              | +                                         |
| Feinberg 2020         | +                            | +                                                                   | +                                                      | +                         | +                      | +                                                   | -                                           | +                                                    | +                                                              | +                                         |
| Hashimoto 2013        | +                            | +                                                                   | +                                                      | +                         | +                      | +                                                   | -                                           | +                                                    | +                                                              | +                                         |
| Helavirta 2016        | +                            | +                                                                   | ?                                                      | +                         | +                      | +                                                   | -                                           | ?                                                    | +                                                              | +                                         |
| Ikeuchi 2010          | +                            | +                                                                   | ?                                                      | +                         | +                      | -                                                   | -                                           | ?                                                    | +                                                              | +                                         |
| Karjalainen 2019      | +                            | +                                                                   | +                                                      | +                         | +                      | +                                                   | +                                           | ?                                                    | +                                                              | +                                         |
| Karlbom 2011          | +                            | +                                                                   | +                                                      | +                         | +                      | +                                                   | -                                           | +                                                    | +                                                              | +                                         |
| Kayal 2019            | +                            | +                                                                   | +                                                      | +                         | -                      | +                                                   | +                                           | +                                                    | +                                                              | +                                         |
| Landerholm 2017       | +                            | +                                                                   | +                                                      | +                         | +                      | +                                                   | -                                           | +                                                    | -                                                              | +                                         |
| Lee 2019              | +                            | +                                                                   | ?                                                      | ?                         | +                      | +                                                   | +                                           | ?                                                    | +                                                              | +                                         |
| Leowardi 2010         | +                            | +                                                                   | ?                                                      | +                         | +                      | +                                                   | +                                           | +                                                    | +                                                              | +                                         |
| Lightner 2017         | +                            | ?                                                                   | ?                                                      | ?                         | +                      | +                                                   | -                                           | ?                                                    | +                                                              | +                                         |
| Lorenzo 2016          | +                            | +                                                                   | +                                                      | ?                         | +                      | +                                                   | -                                           | +                                                    | +                                                              | +                                         |
| Mark-Christensen 2017 | +                            | +                                                                   | +                                                      | ?                         | +                      | +                                                   | -                                           | +                                                    | -                                                              | +                                         |
| McCombie 2016         | +                            | ?                                                                   | ?                                                      | +                         | +                      | +                                                   | -                                           | ?                                                    | -                                                              | +                                         |
| Mege 2016             | +                            | +                                                                   | ?                                                      | +                         | +                      | +                                                   | +                                           | ?                                                    | +                                                              | +                                         |
| Mennigen 2011         | +                            | +                                                                   | ?                                                      | +                         | +                      | +                                                   | +                                           | ?                                                    | +                                                              | +                                         |
| Rokke 2011            | +                            | +                                                                   | ?                                                      | +                         | +                      | +                                                   | -                                           | ?                                                    | +                                                              | +                                         |
| Sahami 2016           | +                            | +                                                                   | ?                                                      | +                         | +                      | +                                                   | +                                           | +                                                    | -                                                              | +                                         |
| Sampietro 2018        | +                            | +                                                                   | ?                                                      | +                         | -                      | +                                                   | +                                           | ?                                                    | +                                                              | ?                                         |
| Tan 2015              | +                            | +                                                                   | ?                                                      | +                         | +                      | +                                                   | -                                           | +                                                    | +                                                              | ?                                         |
| Uchino 2017           | +                            | +                                                                   | +                                                      | ?                         | -                      | +                                                   | +                                           | +                                                    | -                                                              | +                                         |
| Wasmuth 2010          | +                            | +                                                                   | ?                                                      | +                         | +                      | +                                                   | -                                           | ?                                                    | +                                                              | +                                         |
| Wibmer 2010           | +                            | +                                                                   | ?                                                      | +                         | +                      | +                                                   | +                                           | ?                                                    | +                                                              | +                                         |
| Worley 2017           | +                            | +                                                                   | ?                                                      | ?                         | -                      | +                                                   | -                                           | ?                                                    | -                                                              | ?                                         |
| Zaghiyan 2016         | +                            | ?                                                                   | +                                                      | ?                         | +                      | +                                                   | +                                           | ?                                                    | +                                                              | +                                         |
| Zocalli 2019          | +                            | +                                                                   | +                                                      | +                         | +                      | +                                                   | +                                           | ?                                                    | +                                                              | +                                         |

**Supplementary Figure 3.** Risk of bias graph demonstrating the risk of bias for each item of the JBI checklist per individual study.

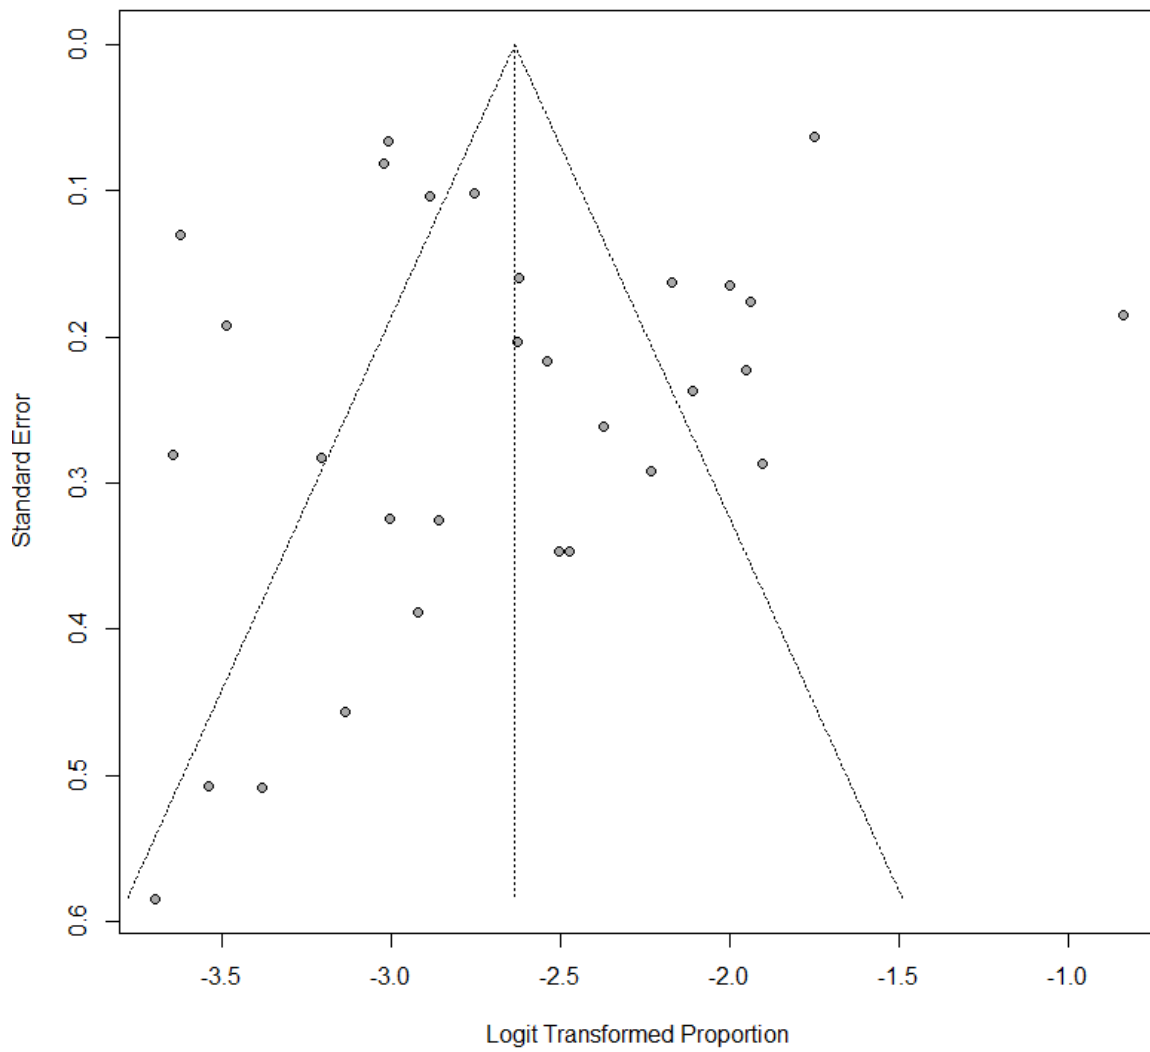

**Supplementary figure 4.** Funnel plot of standard error by logit transformed proportion for pouch failure.

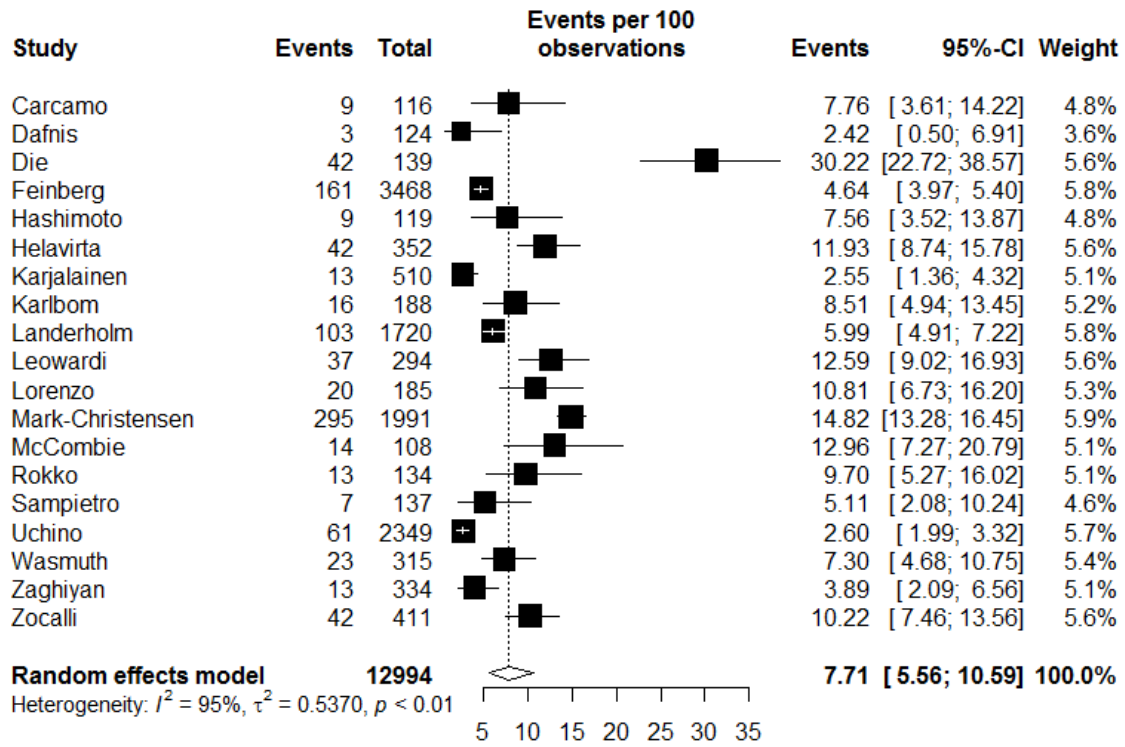

**Supplementary figure 5:** Plot of the individual studies with a median follow-up of  $\geq 5$  years presenting pouch failure rates with 95% confidence intervals (CI) and the overall incidence of pouch failure with 95% CI.

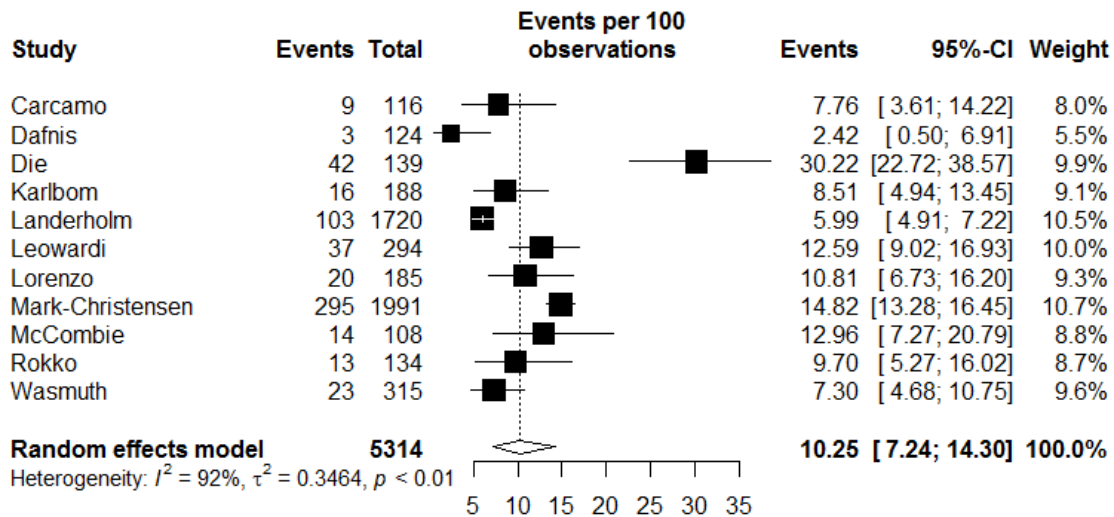

**Supplementary figure 6:** Plot of the individual studies with a median follow-up of  $\geq 10$  years presenting pouch failure rates with 95% confidence intervals (CI) and the overall incidence of pouch failure with 95% CI.

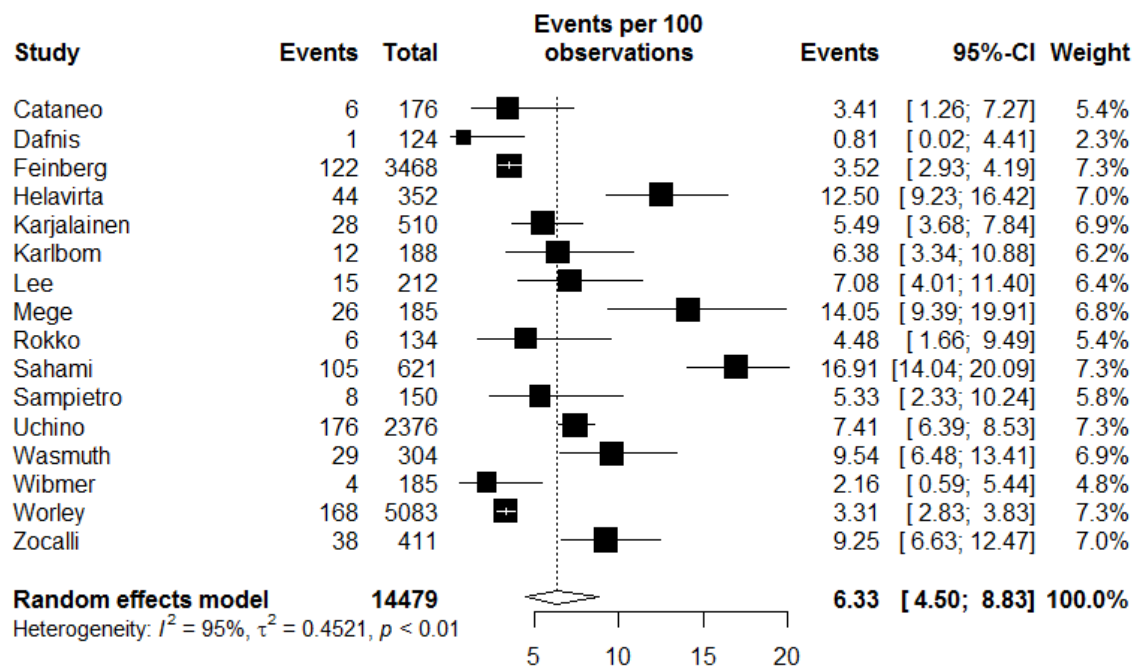

**Supplementary figure 7:** Plot of the individual studies presenting anastomotic leak rates with 95% confidence intervals (CI) and the overall incidence of anastomotic leakage with 95% CI.

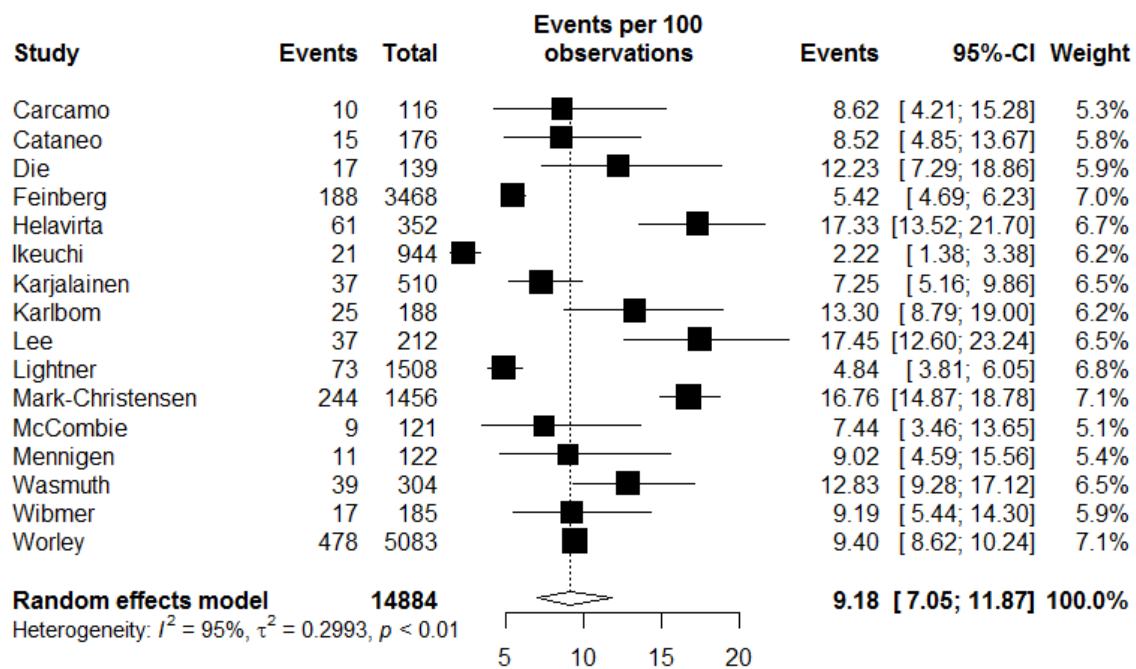

**Supplementary figure 8:** Plot of the individual studies presenting pelvic sepsis with 95% confidence intervals (CI) and the overall incidence of pelvic sepsis with 95% CI.



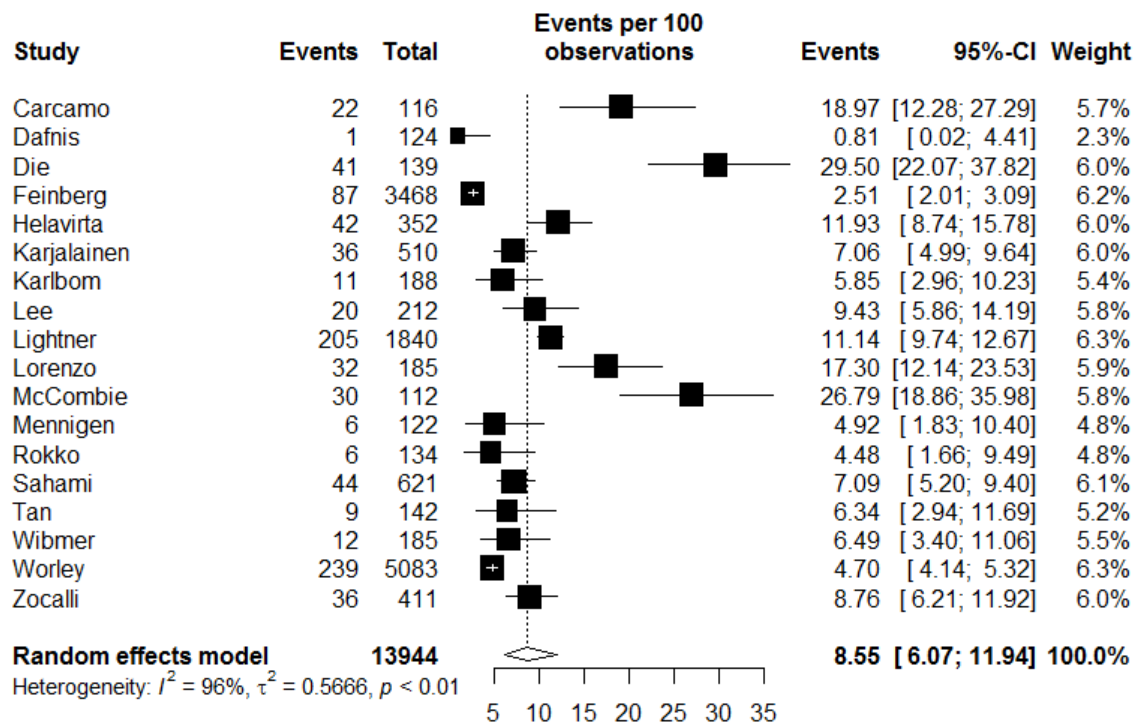

**Supplementary figure 9:** Plot of the individual studies presenting fistula with 95% confidence intervals (CI) and the overall incidence of fistula with 95% CI.

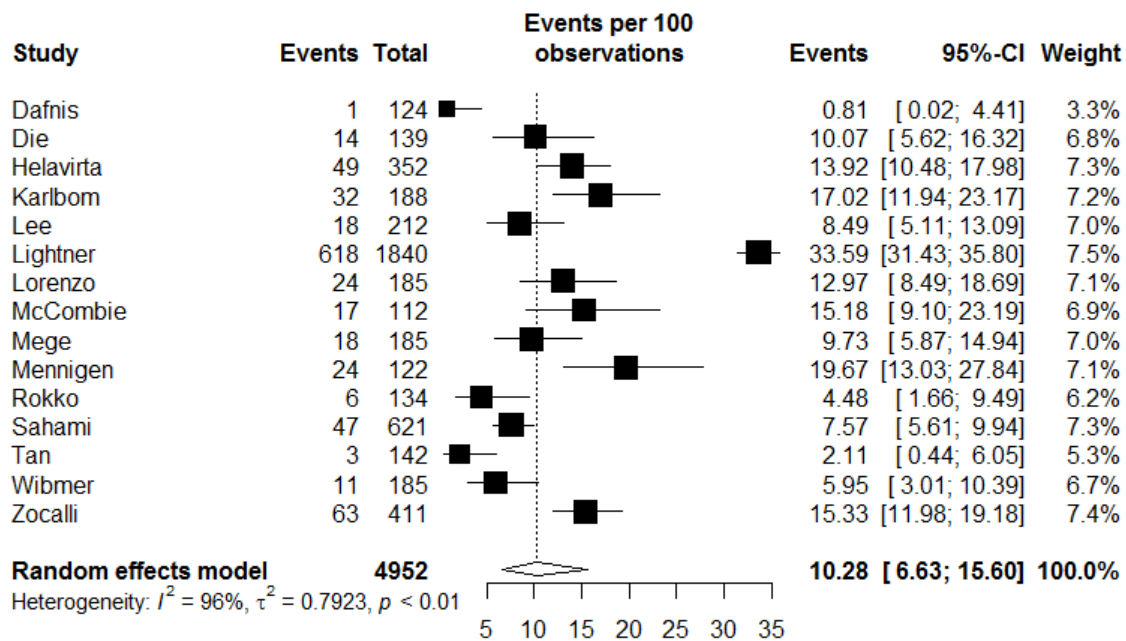

**Supplementary figure 10:** Plot of the individual studies presenting stricture with 95% confidence intervals (CI) and the overall incidence of stricture with 95% CI.

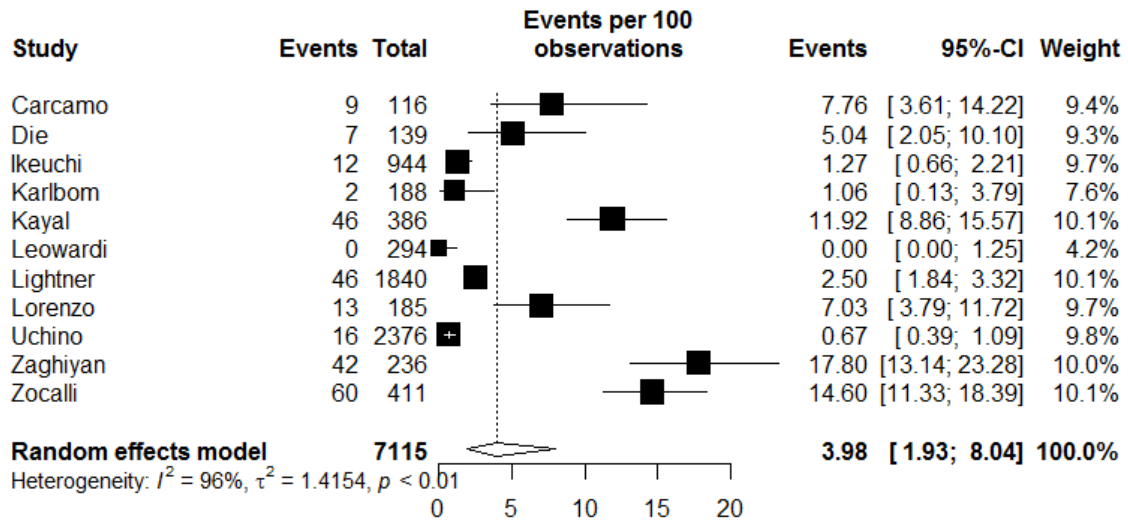

**Supplementary figure 11:** Plot of the individual studies presenting CD of the pouch with 95% confidence intervals (CI) and the overall incidence of CD of the pouch with 95% CI.

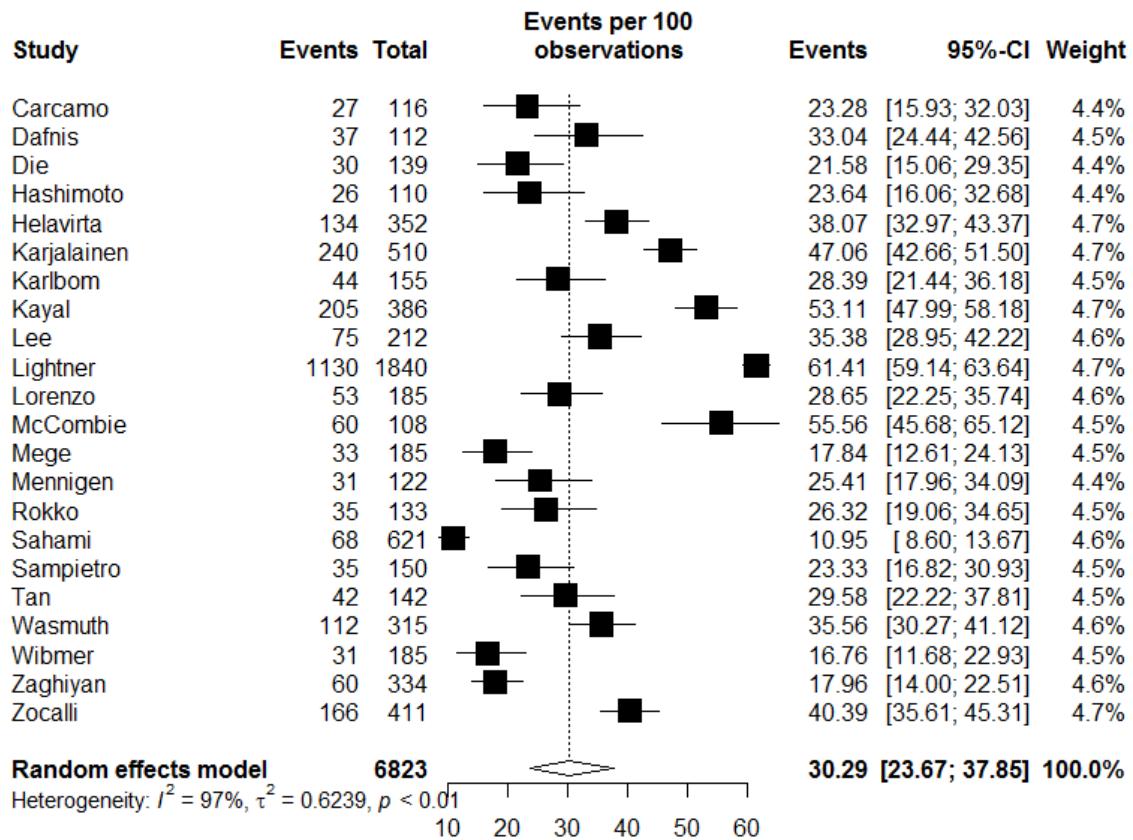

**Supplementary figure 12:** Plot of the individual studies presenting pouchitis with 95% confidence intervals (CI) and the overall incidence of pouchitis with 95% CI.
