# Supplementary material for: Ileal Pouch-anal Anastomosis Complications and Pouch Failure: A systematic review and meta-analysis
Source: PubMed Central journal article supplement — Ann Surg Open. 2021 Jun 21;2(2):e074. doi: 10.1097/AS9.0000000000000074 (PMC10455305; doi:10.1097/as9.0000000000000074), 2021-06-21
Supplement: as9-2-e074-s002.pdf [file as9-2-e074-s002.pdf]

### **Supplementary table 1. Search**

Search date: 6-5-2020

Period: 1-1-2010 t/m 6-5-2020

#### **PubMed: 803 hits**

("Proctocolectomy, Restorative"[Mesh] OR restorative proctocolectom\*[tiab] OR Ileal pouch anal anastomos\*[tiab] OR Ileal pouch[tiab] OR IPAA[tiab]) AND ("Postoperative Complications"[Mesh] OR "Anastomotic Leak"[Mesh] OR anastomotic leak\*[tiab] OR anastomosis leak\*[tiab] OR pouch failure\*[tiab] OR pouch leak\*[tiab] OR pouch function\*[tiab] OR pouch fistul\*[tiab] OR anastomotic complication\*[tiab] OR postoperative complication\*[tiab] OR pelvic sepsis[tiab] OR long term outcome\*[tiab] OR long term complication\*[tiab])) AND (("2010/01/01"[Date - Publication] : "3000"[Date - Publication]))

#### **EMBASE (Ovid): 1064 hits**

Database(s): Embase Classic+Embase 1947 to 2020 May 06

Search Strategy:

| # | Searches                                                                                                                                                                                                                                                                                                         | Results |
|---|------------------------------------------------------------------------------------------------------------------------------------------------------------------------------------------------------------------------------------------------------------------------------------------------------------------|---------|
| 1 | proctocolectomy/ or (restorative proctocolectom* or Ileal pouch anal anastomos* or Ileal pouch or IPAA).ti,ab,kw.                                                                                                                                                                                                | 8754    |
| 2 | exp postoperative complication/ or anastomosis leakage/ or (anastomotic leak* or anastomosis leak* or pouch failure* or pouch leak* or pouch function* or pouch fistul* or anastomotic complication* or postoperative complication* or pelvic sepsis or long term outcome* or long term complication*).ti,ab,kw. | 812380  |
| 3 | 1 and 2                                                                                                                                                                                                                                                                                                          | 3115    |
| 4 | limit 3 to conference abstract status                                                                                                                                                                                                                                                                            | 918     |
| 5 | 3 not 4                                                                                                                                                                                                                                                                                                          | 2197    |
| 6 | limit 5 to yr="2010 -Current"                                                                                                                                                                                                                                                                                    | 1064    |

#### **Cochrane Library: 80 hits**

| ID | Search                                                                                                                                                                                                                                               | Hits  |
|----|------------------------------------------------------------------------------------------------------------------------------------------------------------------------------------------------------------------------------------------------------|-------|
| #1 | (restorative proctocolectom* or Ileal pouch anal anastomos* or Ileal pouch or IPAA):ti,ab,kw                                                                                                                                                         | 279   |
| #2 | (anastomotic leak* or anastomosis leak* or pouch failure* or pouch leak* or pouch function* or pouch fistul* or anastomotic complication* or postoperative complication* or pelvic sepsis or long term outcome* or long term complication*):ti,ab,kw | 99525 |
| #3 | #1 and #2 with Cochrane Library publication date Between Jan 2010 and May 2020                                                                                                                                                                       | 80    |

| <b>Supplementary table 2: Criteria for JBI checklist.</b> |                                                                               |                                                                                                                                                                                          |
|-----------------------------------------------------------|-------------------------------------------------------------------------------|------------------------------------------------------------------------------------------------------------------------------------------------------------------------------------------|
| 1                                                         | Were there clear inclusion criteria?                                          | Low: Patients undergoing primary IPAA.<br>Unclear: not described.<br>High: Other procedures than primary IPAA.                                                                           |
| 2                                                         | Was the condition measured in a standard, reliable way for all participants?  | Low: Pouch failure defined as the need for a permanent ileostomy with or without pouch excision.<br>Unclear: Pouch failure not defined.<br>High: Different definition.                   |
| 3                                                         | Were valid methods used for identification of condition for all participants? | Low: Description of methods used for the assessment of reported complications (imaging, endoscopy, re-intervention).<br>Unclear: no/limited description.<br>High: No valid methods used. |
| 4                                                         | Did the case series have consecutive inclusion of participants?               | Low: Consecutive or all mentioned.<br>Unclear: Consecutive or all missing.<br>High: Selected cases.                                                                                      |
| 5                                                         | Did the case series had complete inclusion of participants?                   | Low: Follow up and/or drop-outs described.<br>High: Missing follow up and/or drop-outs.                                                                                                  |
| 6                                                         | Was there clear reporting of the demographics of the participants?            | Low: Includes age, sex.<br>High: Missing values.                                                                                                                                         |
| 7                                                         | Was there clear reporting of clinical information of the participants?        | Low: Type of disease, indication of surgery, preoperative medication use.<br>High: Missing values.                                                                                       |
| 8                                                         | Were the outcome or follow up results of cases clearly reported?              | Low: Pouch related complications defined.<br>Unclear: Undefined pouch related complications.                                                                                             |
| 9                                                         | Was there clear reporting of the presenting site(s) demographics information? | Low: Single center or in multicenter described per center.<br>High: Multicenter and not described per center.                                                                            |
| 10                                                        | Was statistical analysis appropriate?                                         | Low: Statistical analysis described.<br>Unclear: not described.<br>High: Inappropriate test used.                                                                                        |

| Supplementary table 3: procedural stages and pouch type. |                                                                |                      |                                           |             |                                                                                  |
|----------------------------------------------------------|----------------------------------------------------------------|----------------------|-------------------------------------------|-------------|----------------------------------------------------------------------------------|
| Author                                                   | 1-stage (%)                                                    | Modified-2 stage (%) | 2-stage (%)                               | 3-stage (%) | Type of pouch (%)                                                                |
| Carcamo                                                  | -                                                              | -                    | 31 (26.8)                                 | 85 (73.2)   | J-pouch 112 (96.5)<br>S-pouch 4 (3.5)                                            |
| Cataneo                                                  | -                                                              | -                    | -                                         | -           | J-pouch 176 (100)                                                                |
| Dafnis                                                   | -                                                              | -                    | -                                         | -           | J-pouch 111 (89.5)<br>K-pouch 13 (10.5)                                          |
| Die                                                      | 31 (22.3)                                                      | 0                    | 94 (67.6)                                 | 14 (10.1)   | J-pouch 139 (100)                                                                |
| Feinberg                                                 | -                                                              | -                    | -                                         | -           | J-pouch 3152 (90.9)<br>S-pouch 308 (8.9)<br>W-pouch 1 (0.03)<br>Unknown 7 (0.20) |
| Hashimoto                                                | -                                                              | -                    | -                                         | -           | -                                                                                |
| Helavirta                                                | 98 (27.8)                                                      | 121 (34.4)           | 87 (24.7)                                 | 46 (13.1)   | J-pouch 352 (100)                                                                |
| Ide                                                      | 10 (4.3)                                                       | 0                    | 160 (68.4)                                | 64 (27.4)   | -                                                                                |
| Ikeuchi                                                  | 258 (27.3)                                                     | 0                    | 439 (46.5)                                | 247 (26.1)  | J-pouch 944 (100)                                                                |
| Karjalainen                                              | 352 (69.0)                                                     | 39 (7.6)             | 108 (21.8)                                | 11 (2.2)    | J-pouch 510 (100)                                                                |
| Karlbom                                                  | -                                                              | -                    | -                                         | -           | S-pouch 97 (51.6)<br>J-pouch 89 (47.3)<br>H-pouch 2 (1.1)                        |
| Landerholm                                               | -                                                              | -                    | -                                         | -           | -                                                                                |
| Lee                                                      | 0                                                              | 0                    | 157 (74.1)                                | 55 (25.9)   | -                                                                                |
| Leowardi                                                 | 0                                                              | 0                    | 195 (66.3)                                | 99 (33.7)   | J-pouch 294 (100)                                                                |
| Lightner                                                 | 30 (1.6)                                                       | 0                    | * Nearly all patients underwent a 2-stage |             | J-Pouch 1824 (96.8)<br>S-pouch 44 (2.3)<br>W-pouch 17 (0.9)                      |
| Lorenzo                                                  | 15 (8.1)                                                       | 44 (23.8)            | 42 (22.7)                                 | 84 (45.4)   | J-pouch 180 (97.3)<br>S-pouch 2 (1.01)<br>W-Pouch 1 (0.5)<br>H-pouch 2 (1.01)    |
| Mark-Christensen                                         | -                                                              | -                    | -                                         | -           | -                                                                                |
| McCombie                                                 | -                                                              | -                    | -                                         | -           | -                                                                                |
| Mege                                                     | Patients with no temporary fecal diversion were excluded (n=2) |                      | 82 (44.3)                                 | 103 (55.7)  | -                                                                                |
| Mennigen                                                 | -                                                              | -                    | -                                         | -           | J-pouch 122 (100)                                                                |
| Rokke                                                    | 8 (6.0)                                                        | -                    | 76 (56.7)                                 | 50 (37.3)   | J-pouch 125 (93.3)<br>W-pouch 9 (6.7)                                            |
| Sahami                                                   | 151 (24.3)                                                     | 211 (34.0)           | 165 (26.6)                                | 94 (15.1)   | -                                                                                |
| Sampietro                                                | 7 (4.7)                                                        | 5 (3.3)              | 72(48.0)                                  | 66 (44.0)   | J-pouch 150 (100)                                                                |
| Tan                                                      | 0                                                              | 0                    | 57 (40.1)                                 | 85 (59.9)   | J-pouch 142 (100)                                                                |
| Tonelli                                                  | -                                                              | -                    | -                                         | -           | J-pouch 283 (85.0)<br>S-pouch 50 (15.0)                                          |
| Uchino                                                   | -                                                              | -                    | -                                         | -           | J-pouch 2376 (100)                                                               |
| Wasmuth                                                  | -                                                              | -                    | -                                         | -           | -                                                                                |
| Wibmer                                                   | -                                                              | -                    | -                                         | -           | -                                                                                |
| Worley                                                   | -                                                              | -                    | -                                         | -           | J-pouch 3319<br>W-pouch 665<br>S-pouch 57<br>K-pouch 44<br>Unspecified 998       |
| Zaghiyan                                                 | 0                                                              | 0                    | 242 (72.5)                                | 92 (27.5)   | -                                                                                |
| Zoccali                                                  | 52 (12.7)                                                      | -                    | 204 (49.6)                                | 155 (37.7)  | -                                                                                |
